RESEARCH ARTICLE

# Characterization of the Intestinal Lactobacilli Community following Galactooligosaccharides and Polydextrose Supplementation in the Neonatal Piglet

Jennifer L. Hoeflinger<sup>1</sup>, Dimitri O. Kashtanov<sup>2</sup>, Stephen B. Cox<sup>3</sup>, Scot E. Dowd<sup>3aa</sup>, Zeina E. Jouni<sup>4ab</sup>, Sharon M. Donovan<sup>1,2</sup>, Michael J. Miller<sup>1,2\*</sup>

**1** Department of Food Science and Human Nutrition Sciences, University of Illinois Urbana Champaign, 905 S. Goodwin Ave., Urbana, IL, 61801, United States of America, **2** Division of Nutritional Sciences University of Illinois Urbana Champaign, 905 S. Goodwin Ave., Urbana, IL, 61801, United States of America, **3** Research and Testing Laboratory, 4321 Marsha Sharp FWY, Lubbock, TX, 79407, United States of America, **4** Mead Johnson Nutrition, 400 West Lloyd Expressway, Evansville, IN, 47712, United States of America

<sup>aa</sup> Current address: Molecular Research LP, 503 Clovis Rd., Shallowater, TX, 79363, United States of America

<sup>ab</sup> Current address: Kellogg's, 67 Michigan Ave. W., Battle Creek, MI, 49017, United States of America

\* [mille216@illinois.edu](mailto:mille216@illinois.edu)

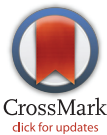

**OPEN ACCESS**

**Citation:** Hoeflinger JL, Kashtanov DO, Cox SB, Dowd SE, Jouni ZE, Donovan SM, et al. (2015) Characterization of the Intestinal Lactobacilli Community following Galactooligosaccharides and Polydextrose Supplementation in the Neonatal Piglet. PLoS ONE 10(8): e0135494. doi:10.1371/journal.pone.0135494

**Editor:** Wenke Feng, University of Louisville School of Medicine, UNITED STATES

**Received:** August 11, 2014

**Accepted:** July 22, 2015

**Published:** August 14, 2015

**Copyright:** © 2015 Hoeflinger et al. This is an open access article distributed under the terms of the [Creative Commons Attribution License](https://creativecommons.org/licenses/by/4.0/), which permits unrestricted use, distribution, and reproduction in any medium, provided the original author and source are credited.

**Data Availability Statement:** Raw read data was submitted to the Sequence Read Archive (NCBI) and can be accessed with the accession number SRP049961.

**Funding:** This study was funded by Mead Johnson Nutrition who had a role in the study design. They had a limited role in the decision to publish and preparation of the manuscript but had no role in the collection and analysis of data. Mead Johnson Nutrition provided support in the form of a salary for author ZEJ, but did not have any additional role in the

## Abstract

Recently, prebiotic supplementation of infant formula has become common practice; however the impact on the intestinal microbiota has not been completely elucidated. In this study, neonatal piglets were randomized to: formula (FORM, n = 8), formula supplemented with 2 g/L each galactooligosaccharides (GOS) and polydextrose (PDX, F+GP, n = 9) or a sow-reared (SOW, n = 12) reference group for 19 days. The ileal (IL) and ascending colon (AC) microbiota were characterized using culture-dependent and -independent methods. 16S amplicon sequencing identified no differences at the genera level in the IL. Interestingly, six genera in the AC were significantly different between FORM and F+GP (P<0.05): *Lactobacillus*, *Ruminococcus*, *Parabacteroides*, *Oscillospira*, *Hydrogenoanaerobacterium* and *Catabacter*. In particular, the relative abundance of AC *Lactobacillus* was higher (P = 0.04) in F+GP as compared to FORM. Culture-dependent analysis of the IL and AC lactobacilli communities of FORM and F+GP revealed a *Lactobacillus* spp. composition similar to 16S amplicon sequencing. Additional analysis demonstrated individual *Lactobacillus* isolates were unable to ferment PDX. Conversely, a majority of lactobacilli isolates could ferment GOS, regardless of piglet diet. In addition, the ability of lactobacilli isolates to ferment the longer chain GOS fragments (DP 3 or greater), which are expected to be present in the distal intestine, was not different between FORM and F+GP. In conclusion, prebiotic supplementation of formula impacted the AC microbiota; however, direct utilization of GOS or PDX does not lead to an increase in *Lactobacillus* spp.

data collection and analysis. The specific role of this author is articulated in the 'author contributions' section. Research and Testing Laboratory and Molecular Research LP provided support in the form of salaries for authors SBC and SED, respectively, but did not have any additional role in the study design, data collection and analysis, decision to publish, or preparation of the manuscript. The specific roles of these authors are articulated in the 'author contributions' section.

**Competing Interests:** The authors have the following interests: Jennifer L. Hoeflinger and Dimitri O. Kashtanov do not have any conflicts of interest. Sharon M. Donovan and Michael J. Miller have received grant funding from Mead Johnson Nutrition, the employer of Zeina E. Jouni at the time of the study. Sharon M. Donovan has served as a paid consultant to Mead Johnson Nutrition. Stephen B. Cox is employed by Research and Testing Laboratory. There are no patents, products in development or marketed products to declare. This does not alter the authors' adherence to all the PLOS ONE policies on sharing data and materials, as detailed online in the guide for authors.

## Introduction

Infants are readily colonized following birth from exposure to the environment, most notably, microbiota from their mother's vagina, skin, feces and potentially human milk [1–4]. After initial colonization, the infant microbiota is assembled through a complex succession of microbiota that is rapidly changing [5,6]. Additionally, the intestinal microbiota is influenced by infant nutrition [7]. Human milk is the gold standard for infant nutrition; however, formula feeding early in life is common and often required. Human milk oligosaccharides (HMOs) and their related glycoproteins and glycolipids are a significant component of human breast milk [8]. HMOs are a complex mixture of structurally diverse oligosaccharides that influence the gut microbial community, reviewed by Coppa and colleagues [9]. Bovine milk-based infant formulas are nearly devoid of complex oligosaccharides [10,11], which may negatively influence microbial colonization. Therefore, there has been interest to supplement infant formulas with alternative prebiotic oligosaccharides to provide similar functional benefits as HMOs [12–14].

Prebiotics are non-digestible carbohydrates that stimulate the growth of beneficial bacteria, thereby providing a health benefit to the host [14–17]. Several prebiotics are generally recognized as safe (GRAS) and are used as food ingredients, such as galactooligosaccharides (GOS), polydextrose (PDX) and fructooligosaccharides (FOS) [17–19]. Prebiotic supplementation of infant formula is well tolerated and stool softness and frequency are similar to breast-fed reference groups [20–22]. Additionally, GOS, commonly supplemented with FOS, increases counts of bifidobacteria [14,20,22,23] and to a lesser extent lactobacilli [23] in infant feces. A recent study reported a dose-dependent increase in lactobacilli in response to PDX supplementation in neonatal piglets [24]. Both bifidobacteria and lactobacilli have been used as commercial probiotics [25] and it is hypothesized that their health promoting functions in the gut may be enhanced by prebiotic supplementation.

Prebiotic supplemented formula is best suited for testing in infants; however, microbial community analysis is limited to feces. Therefore, a suitable analogue for infant studies is the neonatal piglet as it allows for more invasive sampling [26–28]. Findings in human infants show that bovine milk-based formula supplemented with prebiotics does not negatively affect piglet development [24,29–32]. While several studies have investigated the impact of prebiotics on the piglet gut microbiota by older traditional and molecular techniques [24,29,30,32,33], there remains a need for a more descriptive analysis.

In this study, vaginally-delivered neonatal piglets were used to model the development of the infant microbiota in response to GOS/PDX supplemented formula. We utilized culture-dependent and -independent methods to perform a broad analysis of the ileal and colonic microbiota. Additionally, we report several species of lactobacilli that are responsive to GOS supplementation.

## Materials and Methods

### Ethics statement

The experimental procedure and the use of animals were approved by the University of Illinois Institutional Animal Care and Use Committee (IACUC) in accordance with all laws and regulations pertaining to research with animals. The approved protocol was #09268.

### Animal and diets

Neonatal piglets (n = 29) were obtained from the University of Illinois Swine Research Center at 48 h-of-age to allow for ingestion of colostrum. Piglets were transported to animal facilities on campus and were individually-housed in custom cages in rooms maintained at 25°C with

12 h light-dark cycles. Additional heat was provided to an ambient temperature of 30°C within the piglet cages. The study was conducted in one replicate and used 3 litters (littermates were randomized into each treatment group). All piglets were randomized to receive a non-medicated bovine milk-based formula (Advance Baby Pig Liqui-Wean, Milk Specialties Company, Dundee, IL) alone (FORM,  $n = 8$ ) or formula supplemented with 2 g/L each GOS (FrieslandCampina, Meppel, Netherlands) and PDX (Danisco, Tarrytown, NY, USA) (F+GP,  $n = 9$ ). Sow-reared (SOW,  $n = 12$ ) piglets were included as a reference group. Formula was offered immediately after transport to the animal facility and delivered twenty-times daily by pump for a total volume of 360 mL/kg/d for 19 d.

### Sample collection

On d 21, the piglets were lightly sedated with Telazol (7 mg/kg bodyweight; Fort Dodge Animal Health, Fort Dodge, IA, USA) and were euthanized by an intracardiac injection of sodium pentobarbital (72 mg/kg bodyweight; Fatal Plus, Vortech Pharmaceuticals, Ltd., Dearborn, MI, USA). Blood and tissue samples were collected for analysis as previously described [32]. Briefly, the small intestine was quickly excised from the pyloric sphincter to the ileocecal valve and its total length was measured. The intestine was cut into three segments at 10% and 85% of the total small intestine length to separate duodenum, jejunum and ileum. Ileal and AC contents were collected for bacterial enumeration, measurement of pH and percent dry matter or were flash frozen and stored at -80°C for 16S amplicon sequencing. The pH was measured using meter (Mettler Toledo, Columbus, OH, USA) equipped with a combination pH electrode (Hanna Instruments, Woonsocket, RI, USA). Percent dry matter of IL and AC contents was calculated following drying at 100°C for 24 h. Following the removal of contents, intestinal sections were flushed with ice-cold phosphate buffered saline (PBS) and fixed in 10% (v/v) formalin.

### Intestinal histomorphology

Formalin-fixed IL and AC tissue samples were embedded in paraffin wax, sliced to approximately 5  $\mu\text{m}$  with a Leica RM2255 microtome (Leica Geosystems, Norcross, GA, USA), mounted on glass microscope slides and stained with hematoxylin and eosin. Images were captured using the Nanozoomer Digital Pathology suite (Hamamatsu, Bridgewater, NJ, USA) and measurements were determined with AxioVision (Carl Zeiss Microscopy, Thornwood, NY, USA). Images were analyzed for 8–10 well formed villi or cuffs. IL villus height and crypt depth; AC cuff width and depth were measured.

### Fermentation products

IL and AC contents were analyzed for volatile fatty acid (VFA) products by gas chromatography, as previously described [34]. VFAs measured were acetate, propionate and butyrate (short-chain fatty acids [SCFA]). Additionally, several branch-chain fatty acids (BCFA) isobutyrate, isovalerate and valerate were measured.

### Culture-dependent characterization of the microbiome

**Bacterial enumeration.** Ileal and AC contents were homogenized in PBS by vortex and aseptically plated in triplicate using an Eddy Jet spiral plater (Neu-Tec, Farmingdale, NY, USA) on *Lactobacillus* selective (LBS) agar (BD, Franklin Lakes, NJ, USA). The agar plates were incubated for 48 h at 37°C anaerobically (5% CO<sub>2</sub>, 5% H<sub>2</sub> and 90% N<sub>2</sub>). Bacteria were counted using the spiral plater manufacturer's methods and expressed as colony forming units

(CFU) per gram of homogenized sample. Ten colonies per piglet per sample were randomly selected, cultivated in MRS, resuspended in 12.5% glycerol and stored at  $-80^{\circ}\text{C}$ .

**DNA Extraction.** Putative lactobacilli isolates were then grown in 2 mL MRS to stationary phase. Following growth, bacterial genomic DNA was isolated using a modified bead-beating technique [35]. Briefly, 2 mL of cells were pelleted at  $10,000 \times g$  and washed twice with molecular biology grade water (Mo Bio Laboratories, Carlsbad, CA, USA). The pellets were resuspended in  $750 \mu\text{L}$  of 0.5 M EDTA buffer pH 8. The resuspended cells were subjected to bead-beating in a FastPrep-24 Instrument (MP Biomedicals, Solon, OH, USA) at 6 m/s for 1 min. The samples were then centrifuged at  $10,000 \times g$  at  $4^{\circ}\text{C}$  for 3 min. A  $600 \mu\text{L}$  aliquot of the supernatant was removed and frozen at  $-20^{\circ}\text{C}$  for subsequent analysis.

**Identification.** A partial HSP60 sequence was amplified using lactobacilli specific HSP60 primers, LB308F (5' -TGAAGAAYGTNRYNGCYGG-3' ) and LB806RM (5' -AANGTNCCVCGVATCTTGTT-3' ), previously described by Blaiotta and colleagues [36]. The PCR amplification of a 499 bp amplicon was performed with a  $50 \mu\text{L}$  total volume. The reaction system consisted of  $3 \mu\text{L}$  of target DNA,  $5 \mu\text{L}$  of each primer (10 mM),  $25 \mu\text{L}$  of EconoTaq Plus Green 2X Master Mix (Lucigen Corporation, Middleton, WI, USA). The PCR consisted of an initial step of 2 min at  $95^{\circ}\text{C}$ , followed by 35 cycles (30 s at  $95^{\circ}\text{C}$ , 30 s at  $50^{\circ}\text{C}$ , and 1.5 min at  $72^{\circ}\text{C}$ ) and completed with an extension step at  $72^{\circ}\text{C}$  for 15 min. PCR products were purified using the Zymoclean DNA Clean & Concentrator Kit (Zymo Research Corp., Irvine, CA, USA) according to the manufacturer's instructions. PCR products were quantified using a NanoDrop ND-1000 Spectrophotometer (NanoDrop, Wilmington, DE, USA). Sanger sequencing was done with either primer (LB308F or LB806RM) using an ABI 3730XL capillary sequencers (Life Technologies). The sequences were trimmed for quality and uploaded to the BLAST database (NCBI) to determine identity. Species identity was determined at 97% sequence similarity.

To confirm identity, a few isolates from each identified species was further sequenced by amplification of a partial 16S rRNA sequence by using the 16S rRNA primers, 8F (5' -AGAGTTTGATCCTGGCTCAG-3' ) [37] and 1392R (5' -GACGGCGGTGWGTRCA-3' ) [38]. The same PCR conditions, sequencing and identification was performed as outlined above.

**In vitro carbohydrate utilization.** Lactobacilli isolated from IL and AC were tested for the ability to utilize glucose (Fisher Scientific), Purimune galactooligosaccharides (GOSP, Ingre-dion, Westchester, IL, USA), and PDX as the sole carbohydrate source. In preparation for the assay, isolates were revived from  $-80^{\circ}\text{C}$  storage by culturing in 2 mL of MRS anaerobically for 24 or 48 h. Isolates were passaged (1%, v/v) one time into 2 mL semi-synthetic MRS medium (sMRS) containing per liter: 20 g peptone, 5 g yeast extract, 5 g sodium acetate, 2 g disodium phosphate, 2 g ammonium citrate, 1 mL tween 80, 0.1 g magnesium sulfate, 0.05 g manganese sulfate. Glucose (10 g/L) was added when necessary. Isolates were further incubated overnight (16–24 h). Following growth, a 1 mL aliquot of sMRS grown cells were washed twice using PBS, pH 7.0 by centrifugation at  $13,000 \times g$  for 5 min and resuspended in 1 mL sterile carbohydrate-free sMRS.

Stock sMRS solutions containing either a 2% (w/v) of the carbohydrates tested or blank (no added carbohydrate) were prepared and  $130 \mu\text{L}$  aliquots were dispensed into a 96-well plate. The washed isolates were diluted 10-fold in 1 mL of carbohydrate-free sMRS and  $20 \mu\text{L}$  was used to inoculate each well. Experimental plates were pre-incubated anaerobically for 30 min, followed by the addition  $50 \mu\text{L}$  of mineral oil (bioMérieux, Craponne, France) to each well. Immediately, the initial optical density (OD) at 595 nm was measured using a Multiscan Ascent 96-well plate reader (MTX Lab Systems, Vienna, VA, USA). The plates were incubated anaerobically at  $37^{\circ}\text{C}$  for 48 h. After 24 and 48 h incubation, the plates were vortexed to resuspend the cells and OD was recorded. Each well was blank-corrected at each time point (0, 24 and 48 h) and the maximum OD (OD<sub>max</sub>) was calculated at 24 and 48 h. Utilization cutoffs

were defined by the OD<sub>max</sub> obtained and are as follows; low utilization: OD < 0.4, moderate utilization: 0.4 > OD < 0.7 and high utilization: OD > 0.7. The relative utilization of GOS and PDX was calculated to adjust for isolates incapable of growing in vitro.

**Thin layer chromatography.** Consumption of GOSP was determined by measuring the GOS fractions remaining in the post-fermentation supernatants of lactobacilli isolated from the IL and AC as previously described [39]. Briefly, 2  $\mu$ L of a 1% (v/v) carbohydrate standard or bacterial post-fermentation supernatant was spotted onto TLC silica gel plates (Sigma-Aldrich, St. Louis, MO, USA). Glucose, galactose (Sigma-Aldrich), lactose (Fisher Scientific) and GOSP were included as carbohydrate standards. The TLC developing solvent was composed of a 2:1:1 mixture of n-propanol (Fisher Scientific), acetic acid (Fisher Scientific) and water. TLC plates were further prepared by spraying an ethanol based solution containing 0.5% (w/v)  $\alpha$ -naphthol (Alfa Aesar) and 5% (v/v) H<sub>2</sub>SO<sub>4</sub> (Sigma-Aldrich). TLC plates were visualized by heating at 100°C for 5 min.

## Culture-independent characterization of the microbiome

**DNA extraction.** Bacterial genomic DNA was isolated from 200–300 mg of IL and AC contents using a modified bead beating method [40,41]. The modifications included: (1) IL and AC content samples were lysed using a 3 min homogenization step with beads using a vortexer and (2) extracted DNA was resuspended in TE buffer overnight at 4°C instead of mechanical pipetting. These modifications were used to minimize DNA shearing for downstream applications. The DNA was purified using QIAmp DNA Stool Kits (Qiagen, Valencia, CA, USA). Extracted DNA was quantified by NanoDrop.

**Quantitative PCR.** Butyrate productivity was quantified from extracted bacterial genomic DNA from AC contents. Butyrate productivity was determined by amplification of the Butyryl-Coenzyme A transferase using previously published methods [42]. Standard curves of 10<sup>2</sup> to 10<sup>8</sup> CFU/mL were produced using a 573 bp gene product synthesized and ligated into a plasmid (GeneArt, Carlsbad, CA, USA). The minimum detectable CFU/mL was 10<sup>3</sup>. The AC bacterial genomic DNA was diluted 10-fold prior to quantification. Quantitative PCR was performed using the Applied Biosystems 7900HT Fast Real-Time PCR System (Applied Biosystems, Carlsbad, CA, USA). Each 10  $\mu$ L qPCR reaction included 5  $\mu$ L of 2x Power SYBR Green PCR Master mix (Applied Biosystems), bovine serum albumin at a final concentration of 1  $\mu$ g/ $\mu$ L (New England Bio Labs, Ipswich, MA, USA), 0.5  $\mu$ M of each primer and 2  $\mu$ L of the DNA sample. The PCR conditions were 50°C for 2 min, 95°C for 10 min, followed by 40 cycles of 95°C for 15 s, 53°C for 1 min and 72°C for 30 s. Following amplification, a dissociation step was included to analyze the melting profile of the amplified products and ensure that no extraneous products were generated.

**16S amplicon sequencing.** Genomic DNA isolated from IL and AC contents were analyzed by 16S amplicon sequencing at the Research and Testing Laboratory (RTL, Lubbock, TX) based upon RTL protocols [43]. Briefly, the V1-V3 hypervariable region of the 16S rRNA gene was amplified using the Gray28F (5' -GAGTTTGATCNTGGCTCAG-3') and Gray519R (5' -GTNTTACNGCGGCKGCTG-3') primer set. Sequencing was performed using the Roche 454 FLX instrument (Roche, Indianapolis, IN, USA). For a detailed description of the sequencing and bioinformatic analyses, refer to Ishak and colleagues [44]. Raw read data was submitted to the Sequence Read Archive (NCBI) and can be accessed with the accession number SRP049961.

**Statistical analyses and illustrations.** Analysis of piglet weight, weight gain, intestinal lengths and weights, intestinal histomorphology, fermentation products and bacterial enumeration was performed using the general linear model (GLM) procedure within SAS (Version



9.2, SAS Institute, Cary, NC, USA). When significant comparisons ( $P < 0.05$ ) were observed, post hoc analysis using the least significant difference (LSD) was used. Lactobacilli communities are presented as stacked bar charts produced with R [45] using the gplots [46] package. Dendrograms were constructed using the Bray-Curtis Dissimilarity index using the vegan [47] R package. Prior to analysis of the 16S amplicon sequencing data, rarefaction was used to standardize richness to 3118 sequences per sample, thus facilitating comparisons among groups. In addition, IL samples were analyzed separately from AC samples. Microbial diversity and richness was quantified as the number of operational taxonomic units (OTUs) or with Chao1's richness estimator (each were defined based on 3% divergence). The impact of diet on bacterial diversity and total estimated richness was evaluated using one-way ANOVA. The overall variability within the microbiota was illustrated using Principle Coordinates Analysis (PCoA), and multivariate differences among diet groups were evaluated using distance-based redundancy analysis (dbRDA) [48]. For PCoA and dbRDA, phylogenetic distances among samples were first calculated using the UniFrac distance measure, unweighted UniFrac distance considers only changes in composition (i.e., identities) [49]. UniFrac was calculated using QIIME [50], and all other analyses were conducted in R [45], using the vegan [47] and labdsv [51] packages. Individual bacterial taxa were screened for differences among diets using ANOVA. Prior to analysis, relative abundances were transformed using an arcsin transform ( $p' = \arcsin(\sqrt{p})$ ). To control for errors due to multiple testing and to limit the amount of false positives, ANOVA model p-values were adjusted to maintain a false discovery rate (FDR) of 10%. Indicator species analysis [52] was used to identify individual species within the genus *Lactobacillus* that were indicative of each of the diets. Indicator species analysis synthesizes information about occurrence and abundance of individual taxa, and this information is summarized as an indicator score. The analysis also provides a randomization test of the degree to which taxa are indicative of a particular state. Here, all species are shown, regardless of the results of the randomization test.

## Results

### Animal observations

The final body weight and overall weight gain of the piglets were not different between the groups ( $P > 0.05$ , data not shown). Additionally, the total intestinal weight and length did not differ between groups and averaged  $196 \pm 41.3$  g/kg and  $148.8 \pm 40.3$  cm/kg; respectively. Intestinal histomorphology demonstrated that the ileal (IL) villus length, crypt depth and ascending colon (AC) cuff width were not significantly different among the groups ( $P > 0.05$ ; Table 1). However, the SOW group had significantly deeper AC cuff depth as compared to FORM and F+GP groups ( $P < 0.0001$ ). While there were no differences in the percentage of dry matter in the AC contents ( $P > 0.05$ , Table 1), the percentage of dry matter in the IL was lower in the F+GP group than the SOW group ( $P = 0.04$ ), but not the FORM group.

### Isolation and characterization of intestinal lactobacilli

Based on published research, we hypothesized that supplementation of GOS/PDX should selectively stimulate the growth of lactobacilli. Therefore immediately following euthanasia, IL and AC contents were plated on *Lactobacillus* selective (LBS) agar to obtain lactobacilli isolates. Total presumptive *Lactobacillus* counts (CFU/g) were not significantly different between the groups or location ( $P > 0.05$ , data not shown). While the absolute abundance of lactobacilli was not different between groups, it may be the composition of the lactobacilli community that is important. Therefore, approximately 10 isolates per piglet were cultivated and speciated using a combination of the HSP60 and 16S rDNA gene sequences. All of the isolates identified were

**Table 1. Histomorphology of ileum and ascending colon of 21-d-old piglets fed formula (FORM), formula supplemented with GOS and PDX (F+GP) or sow-reared (SOW).**

|                        | Diets              |     |                  |     |                   |     | GLM ANOVA<br>p-value |
|------------------------|--------------------|-----|------------------|-----|-------------------|-----|----------------------|
|                        | FORM               |     | F+GP             |     | SOW               |     |                      |
|                        | Mean               | SD  | Mean             | SD  | Mean              | SD  |                      |
| <b>Ileum</b>           |                    |     |                  |     |                   |     |                      |
| Villus Length (μm)     | 495                | 156 | 401              | 61  | 387               | 70  | > 0.05               |
| Crypt Depth (μm)       | 184                | 45  | 177              | 30  | 202               | 32  | > 0.05               |
| Dry Matter (%)         | 12.6 <sup>ab</sup> | 3.6 | 9.9 <sup>a</sup> | 2.9 | 15.3 <sup>b</sup> | 5.7 | 0.04                 |
| <b>Ascending Colon</b> |                    |     |                  |     |                   |     |                      |
| Cuff Width (μm)        | 51 <sup>b</sup>    | 5   | 58 <sup>a</sup>  | 6   | 56 <sup>ab</sup>  | 5   | 0.05                 |
| Cuff Depth (μm)        | 275 <sup>a</sup>   | 24  | 261 <sup>a</sup> | 24  | 357 <sup>b</sup>  | 38  | < 0.0001             |
| Dry Matter (%)         | 21.3               | 3.9 | 21.0             | 3.0 | 20.5              | 5.2 | > 0.05               |

<sup>a b</sup> values within the row with the same letters are not different.

doi:10.1371/journal.pone.0135494.t001

of the order *Lactobacilliales* and were represented by eight *Lactobacillus* species and two non-*Lactobacillus* genera. Unfortunately, the co-isolation of *Pediococcus* and *Weisella* with *Lactobacillus* in the formula-fed piglets was quite significant (range 10–37% of total isolates). The *Pediococcus* and *Weisella* isolates were removed from further analyses.

Culture-dependent analysis showed a variable lactobacilli community between groups (Fig 1). The SOW group was dominated by two lactobacilli: *L. johnsonii* (IL: 64%, AC: 50%) and *L. reuteri* (IL: 33%, AC: 44%). While *L. johnsonii* was also highly abundant in the FORM and F+GP groups, these two groups had a more diverse lactobacilli community as compared to the SOW group. *L. vaginalis* was solely detected in the FORM and F+GP groups, representing 7–13% (IL and AC) of the isolates.

To determine if the supplementation of GOS/PDX selectively enriches for a GOS/PDX fermenting community, carbohydrate utilization was conducted with the FORM and F+GP lactobacilli isolates (Fig 2 and S1 Table). The majority of lactobacilli isolates from both the FORM and F+GP piglets were found to utilize GOS well ( $\Delta OD > 0.7$ ); whereas, the utilization of PDX was minimal. While a larger proportion of lactobacilli isolates were defined as high utilizers of GOS in the IL (FORM: 87.5% vs. F+GP: 97.3%), this was not the case in the ascending colon (FORM: 86% vs. F+GP: 70.7%). Thin layer chromatography was conducted to determine if the ability to consume different GOS fractions was different due to GOS supplementation (data not shown). In general, the lactobacilli isolates with a low ( $\Delta OD < 0.4$ ) or moderate ( $0.4 > \Delta OD < 0.7$ ) ability to utilize GOS corresponded with a reduction in the mono- and disaccharide fractions (DP1-2). The lactobacilli isolates classified as high utilizers ( $\Delta OD > 0.7$ ) demonstrated partial consumption of trisaccharide GOS (DP3) as well as complete consumption of the DP1-2 fractions. We did not observe any reduction in the longer GOS chains (DP4-6) by any of the isolates. Interestingly, *L. vaginalis* was observed to differentially utilize GOS *in vitro*. The few *L. vaginalis* isolates that grew to an  $OD > 0.4$  showed at least partial consumption of GOS (DP1-3); whereas, the majority of isolates were not capable of fermenting GOS as a sole carbon source. Overall, the consumption of GOS was not different between the FORM and F+GP piglets regardless of location.

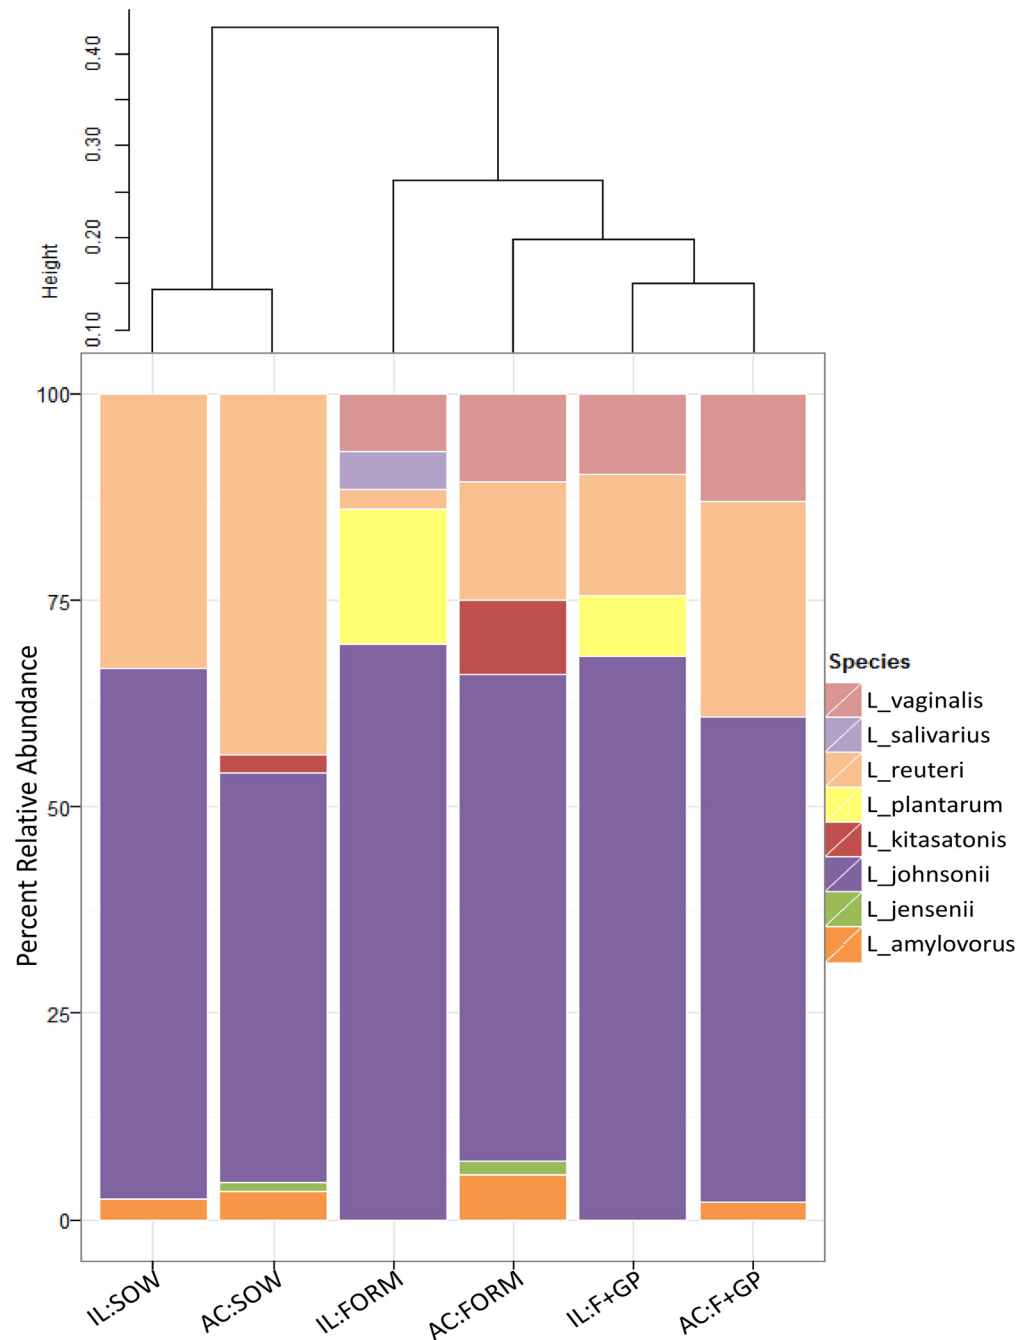

**Fig 1. Lactobacilli population is dominated by few members.** Lactobacilli communities isolated from the ileum (IL) and ascending colon (AC) of 21 d old piglets fed either a bovine milk-based formula (FORM), formula supplemented with GOS and PDX (F+GP) or sow-reared (SOW). Stacked bar chart represents the percent relative abundance of each lactobacilli detected in the community. Beta diversity was calculated using the Bray-Curtis Dissimilarity Index and is visualized by a dendrogram.

doi:10.1371/journal.pone.0135494.g001

### Characterization of intestinal bacterial community

The IL and AC microbiota was analyzed by 16S amplicon sequencing which generated a total of 292,547 sequences with an average of 5,519 sequences per sample. Following sequence normalization, overall microbial diversity was determined by calculating the total number of



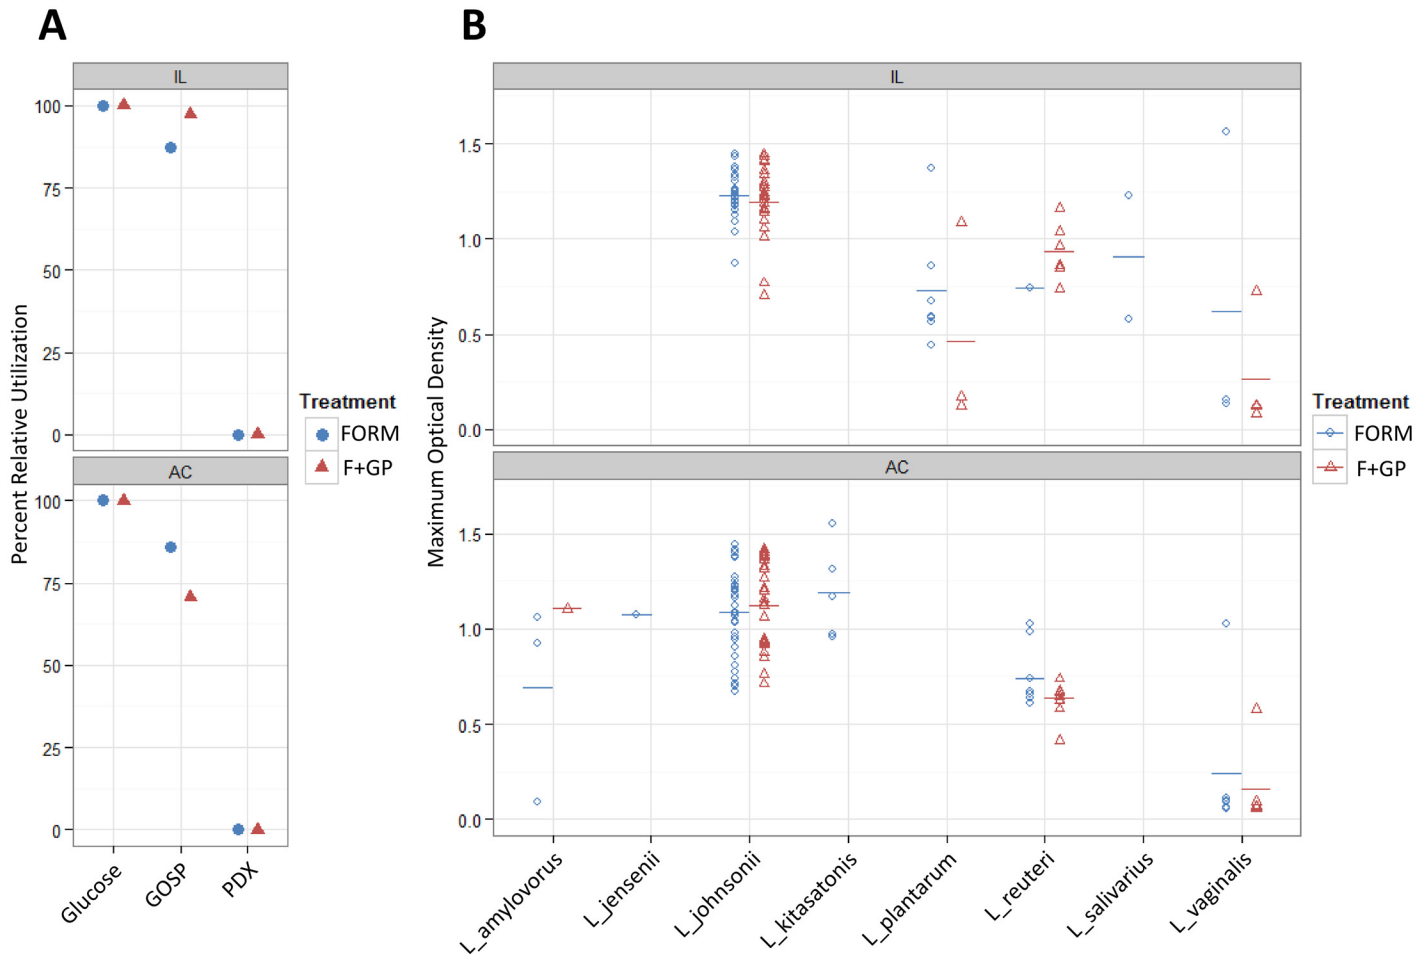

**Fig 2. Several isolated lactobacilli identified as GOS utilizers.** Carbohydrate utilization of lactobacilli communities isolated from the ileum (IL) and ascending colon (AC) of 21 d old piglets fed either a bovine milk-based formula (FORM), formula supplemented with GOS and PDX (F+GP). (A) Percent relative utilization (OD>0.7) of glucose, Purimune galactooligosaccharide (GOSP) or PDX. To account for isolates not capable of *in vitro* fermentation, utilization was normalized to maximum number of isolates capable of utilizing glucose as a sole carbon source. (B) Maximum optical density (595 nm) of *Lactobacilli* sp. when GOSP is supplemented as a sole carbon source. Colored bar indicates the mean maximum optical density. Not all *Lactobacillus* sp. were detected in each treatment or location.

doi:10.1371/journal.pone.0135494.g002

operational taxonomic units (OTUs) detected and total richness was estimated by the Chao1 index (Table 2). The SOW group had higher IL microbial diversity and total richness as compared to the formula-fed piglets (OTUs: P = 0.01, Chao1: P = 0.025; respectively). The microbial diversity and total richness were not significantly different in the AC.

The overall variation in the piglet microbiota among the three groups was evaluated using a distance-based redundancy analysis (dbRDA). Distances were calculated using the unweighted Unifrac distance measure and were illustrated using Principle Coordinates Analysis (PCoA). The PCoA of the piglet microbiome shows a clear divergence in location of samples (IL vs. AC) and between the SOW piglets and the formula-fed piglets (Fig 3a). This divergence was evident following characterization at the taxonomic level. A heatmap was constructed with the relative abundances of the dominant taxa in both locations (S1 Fig). Groups were clustered using the unweighted Unifrac distances. In the IL, the SOW group was characterized by a high abundance of *Clostridium* spp. whereas the formula-fed piglets were defined more by the presence

**Table 2. Microbial analysis from ileal and ascending colon contents of 21d old piglets fed formula (FORM), formula supplemented with GOS and PDX (F+GP) or sow-reared (SOW) as determined by 16S amplicon sequencing.**

|                         | Diets             |      |                   |      |                   |      | GLM ANOVA<br>p-value |
|-------------------------|-------------------|------|-------------------|------|-------------------|------|----------------------|
|                         | FORM              |      | F+GP              |      | SOW               |      |                      |
|                         | Mean              | SD   | Mean              | SD   | Mean              | SD   |                      |
| <b>Ileum</b>            |                   |      |                   |      |                   |      |                      |
| Total Sequences         | 9597              | 2331 | 7973              | 1823 | 5154              | 2029 | ND <sup>2</sup>      |
| OTUs <sup>1</sup> (97%) | 667 <sup>a</sup>  | 157  | 660 <sup>a</sup>  | 150  | 851 <sup>b</sup>  | 146  | 0.01                 |
| Chao1 (97%)             | 1266 <sup>a</sup> | 265  | 1322 <sup>a</sup> | 263  | 1647 <sup>b</sup> | 300  | 0.025                |
| <b>Ascending Colon</b>  |                   |      |                   |      |                   |      |                      |
| Total Sequences         | 5067              | 1529 | 4674              | 912  | 3457              | 1293 | ND <sup>2</sup>      |
| OTUs <sup>1</sup> (97%) | 892               | 80   | 902               | 95   | 868               | 153  | > 0.05               |
| Chao1 (97%)             | 1680              | 190  | 1686              | 176  | 1757              | 240  | > 0.05               |

<sup>1</sup> OTU and Chao1 normalized to 3118 sequences per sample.

<sup>2</sup> ND = not determined.

<sup>a b</sup> values within the row with the same letters are not different.

doi:10.1371/journal.pone.0135494.t002

of *Weissella* spp. In the AC, the differences in relative abundance of *Faecalibacterium* and *Parabacteroides* showed separation of the SOW group from the formula-fed groups (S2 Fig).

In general, our data (Fig 3 and S1 and S2 Figs) demonstrates that sow-reared piglets may not be an appropriate reference group. The primary focus of this study was to analyze the bacterial composition due to a prebiotic supplementation. The differences between the formula-fed piglets and the sow-reared piglets were not solely dietary; therefore, the 16S amplicon

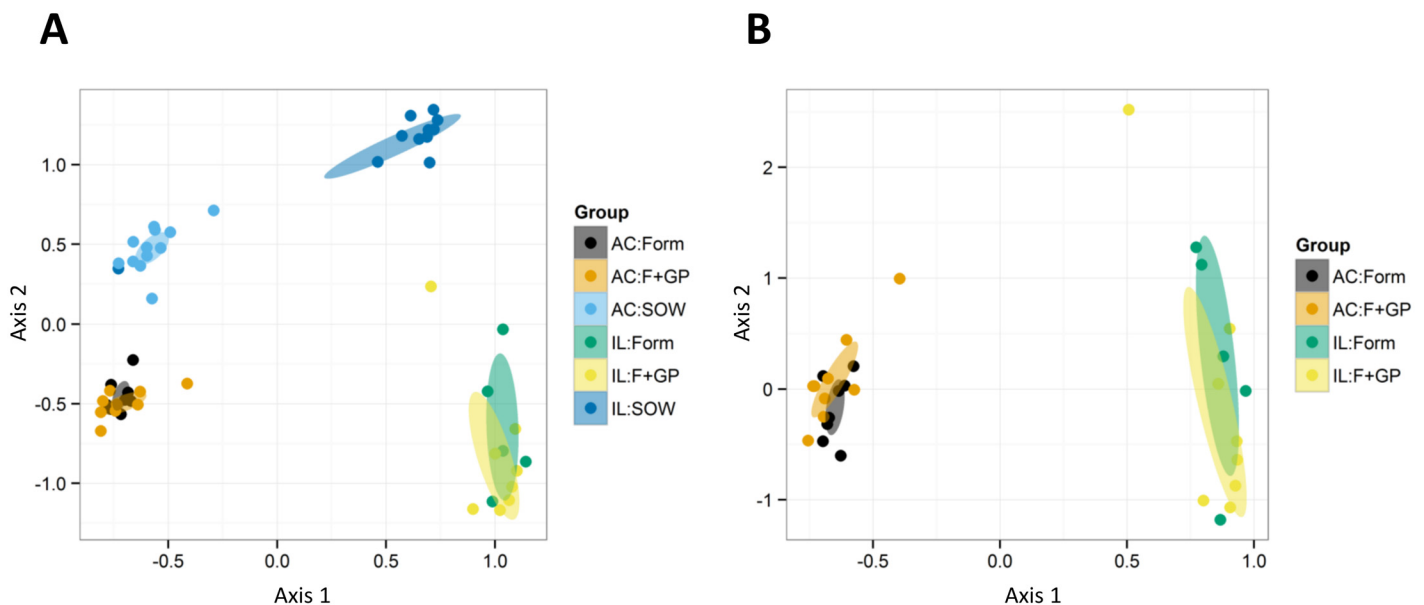

**Fig 3. Bacterial communities vary greatly by location, but less by diet.** Ileal (IL) and ascending colon (AC) microbiome of 21 d old piglets fed either a bovine milk-based formula (FORM), formula supplemented with GOS and PDX (F+GP) or sow-reared (SOW) illustrated by Principle Coordinate Analysis (PCoA). PCoA was constructed from the unweighted Unifrac distance measure which only considers the change in composition not abundance. PCoA of the 16S amplicon sequencing data set: (A) all three treatments; (B) formula-fed piglets only.

doi:10.1371/journal.pone.0135494.g003

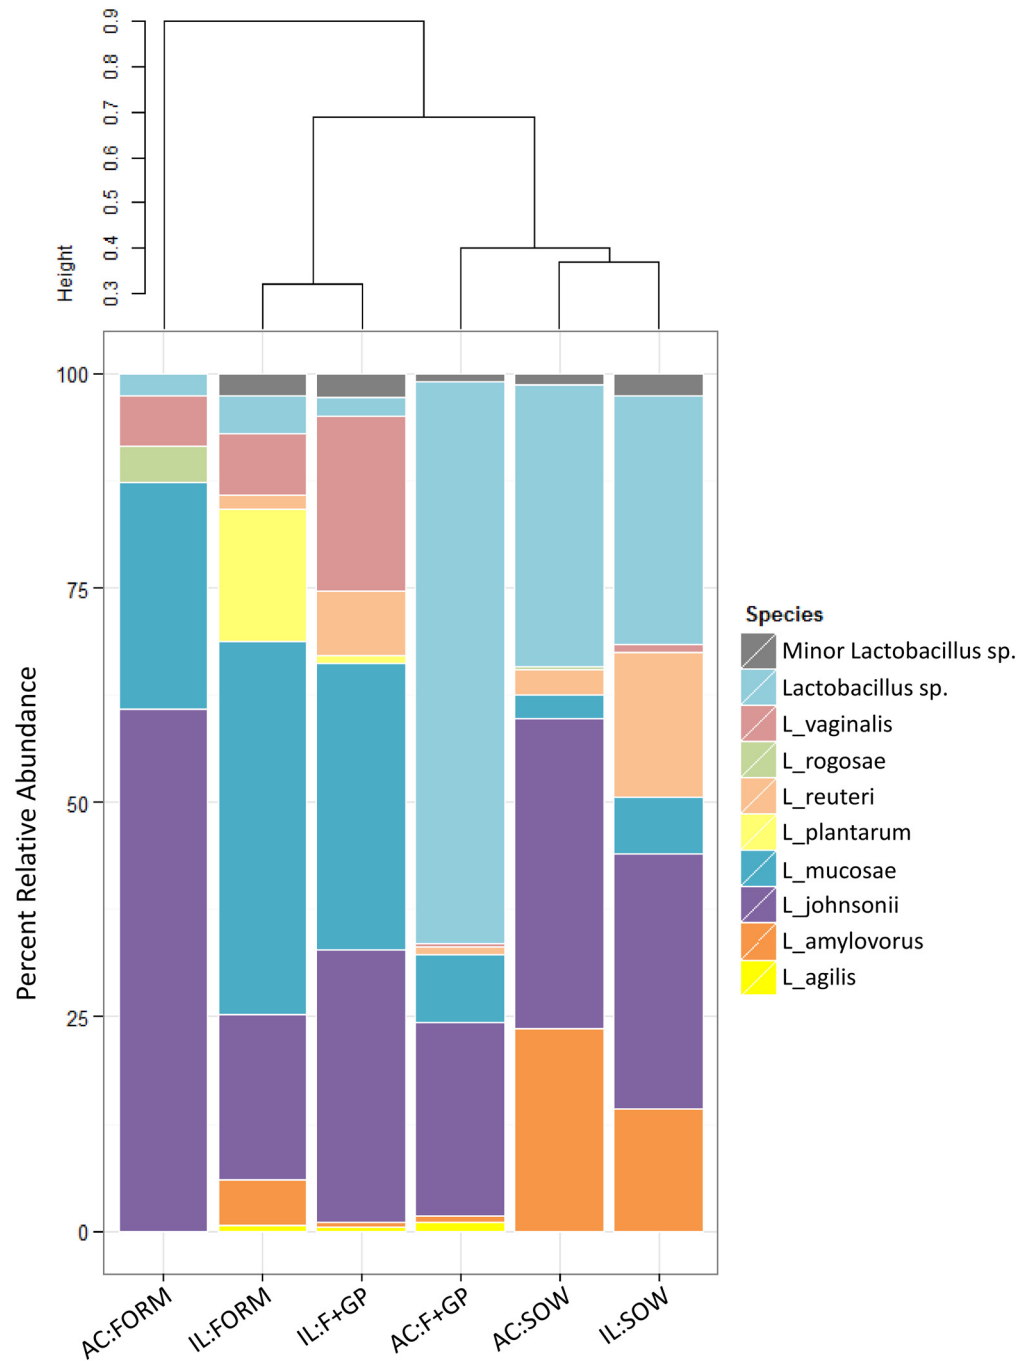

**Fig 4. Culture-independent analysis reveals a more diverse lactobacilli community.** Lactobacilli communities from the ileum (IL) and ascending colon (AC) of 21 d old piglets fed either a bovine milk-based formula (FORM), formula supplemented with GOS and PDX (F+GP) or sow-reared (SOW) as determined by 16S amplicon sequencing. Stacked bar chart represents the percent relative abundance of each lactobacilli detected in the community. Beta diversity was calculated using the Bray-Curtis Dissimilarity Index and is visualized by a dendrogram. Lactobacilli represented by the label Lactobacillus sp. were unable to be assigned a species. Minor Lactobacillus sp. is an aggregate of lactobacilli present in > 1% percent relative abundance (S3 Table).

doi:10.1371/journal.pone.0135494.g004

sequencing data was reanalyzed without the SOW group in order to observe differences due solely to the prebiotic supplementation.

Consistent with the previous 16S amplicon sequencing data, the microbial diversity and total richness of the FORM and F+GP groups were not significantly different in the IL or AC ( $P > 0.05$ , data not shown). Similar clustering between the FORM and F+GP groups by location was observed when determining the overall variation of the microbiome with a PCoA of the unweighted Unifrac distances (Fig 3b). In the IL, no detected genera had a FDR less than 10%; therefore further statistical analysis was not performed. However, six genera were detected in the AC that had an FDR less than 10% and were determined to be significantly different ( $P < 0.05$ ) between the FORM and F+GP groups based on differences in relative abundance (S2 Table and S2 Fig). *Ruminococcus*, *Oscillospira*, *Hydrogenoanaerobacterium* and *Catabacter* were significantly more abundant in the FORM group, while *Parabacteroides* and *Lactobacillus* were significantly more abundant in the F+GP group. Interestingly, the relative abundance of *Parabacteroides* more than two times greater in the F+GP piglets (FORM:  $8.67 \pm 2.22$  vs. F+GP:  $18.33 \pm 3.98$ ; S2 Table).

### Culture-independent examination of lactobacilli community

16S amplicon sequencing analysis identified that the *Lactobacillus* genus differed between the FORM and F+GP groups in the AC (SOW group is included for reference). Eight major species of *Lactobacillus*, having a relative abundance above 1% of the total lactobacilli community, were detected in IL and AC (Fig 4). Consistent with the culture-dependent results, *L. johnsonii* is a dominant member of the lactobacilli community in all piglets. On the other hand, *L. mucosae* was detected in all piglets by 16S amplicon sequencing; however, was not among the lactobacilli isolated from either the IL or AC.

Further analysis was conducted to determine if any lactobacilli were predictive of a particular treatment (Fig 5a and 5b). Indicator species analysis showed that *L. plantarum*, *L. amylovorus* and *L. pentosus* to be indicative of the group FORM but not the F+GP group in the IL (Fig 5a). Conversely, *L. vaginalis*, *L. johnsonii* and *L. reuteri* were more indicative of the F+GP group in the IL. In the AC, *L. johnsonii*, *L. mucosae*, *L. agilis* and *L. reuteri* were highly indicative of the F+GP group as compared to the FORM group; whereas, *L. vaginalis* and *L. rogosae*, were slightly indicative of the FORM group (Fig 5b).

### Fermentation products

Volatile fatty acids (VFA) were determined from the IL and AC contents (Fig 6). In the IL, propionate was higher ( $P = 0.028$ ) in the FORM group as compared to the F+GP and SOW groups; (Fig 6a) and isovalerate concentration was lower ( $P = 0.004$ ) in the F+GP group when compared to the SOW group, but not the FORM group (Fig 6b). The IL pH ranged from 7.7–7.8 and was not different among the treatment groups ( $P = 0.892$ ). In the AC, there were no significant differences in the measured SCFAs ( $P > 0.05$ , Fig 6c). Furthermore, the SOW group had higher observed levels of isobutyrate ( $P = 0.004$ ), isovalerate ( $P = 0.001$ ) and total BCFA ( $P = 0.008$ ) than the formula-fed groups (Fig 6d). The AC pH tended ( $P = 0.055$ ) to be lower in both formula-fed groups (FORM: 6.8, F+GP: 6.6) than in the SOW group (7.3).

The total butyrate productivity was evaluated in the AC contents using quantitative PCR. The absolute abundance of the butyryl-Coenzyme A transferase gene was not significantly different between the three groups ( $P = 0.4281$ , data not shown).

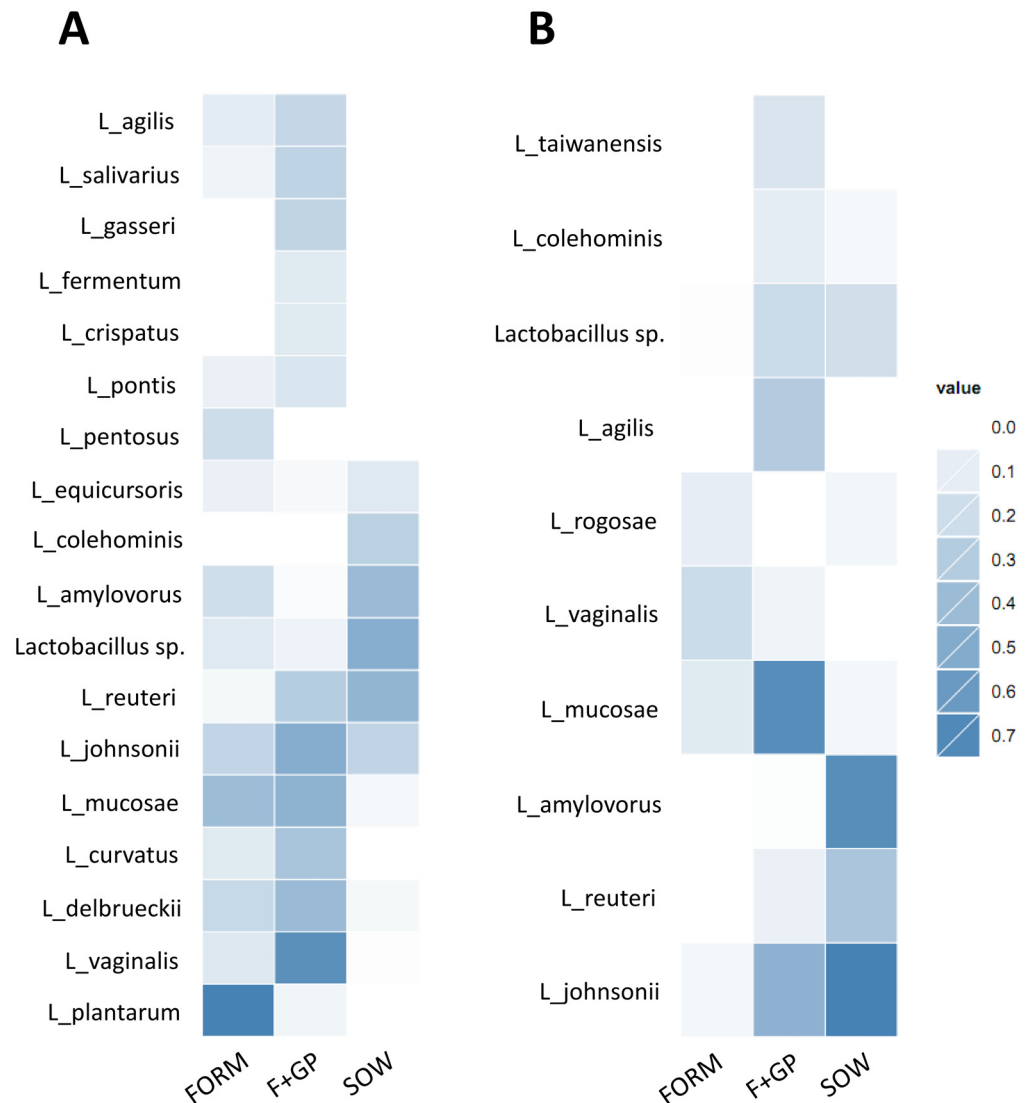

**Fig 5. Identification of the predominant *Lactobacillus* spp. in each group.** Indicator species analysis (ISA) of the lactobacilli community of 21 d old piglets fed either a bovine milk-based formula (FORM), formula supplemented with GOS and PDX (F+GP) or sow-reared (SOW, included for reference). Color change demonstrates the more a species is indicative of a diet. The higher the indicator score (i.e. darker color), the more that species is indicative of that group. ISA scores for the genera *Lactobacillus* detected in the (A) IL; (B) AC.

doi:10.1371/journal.pone.0135494.g005

## Discussion

Prebiotic supplementation of infant formula is well tolerated, improves the consistency and frequency of stools and provides a bifidogenic effect [14,20–22,53–57]. Additionally, our group has shown that prebiotic supplementation does not increase bacterial translocation in neonatal piglets [32]. Taken together, these studies demonstrate the nutritional benefits and safety for prebiotic supplementation of infant formula. However, a detailed examination of the impact of prebiotics on the composition of the gut microbiome and the products of microbial fermentation is lacking. In addition, identification of prebiotic-responsive lactobacilli could assist in determining which organisms are enhanced by prebiotic supplementation. In this study, the

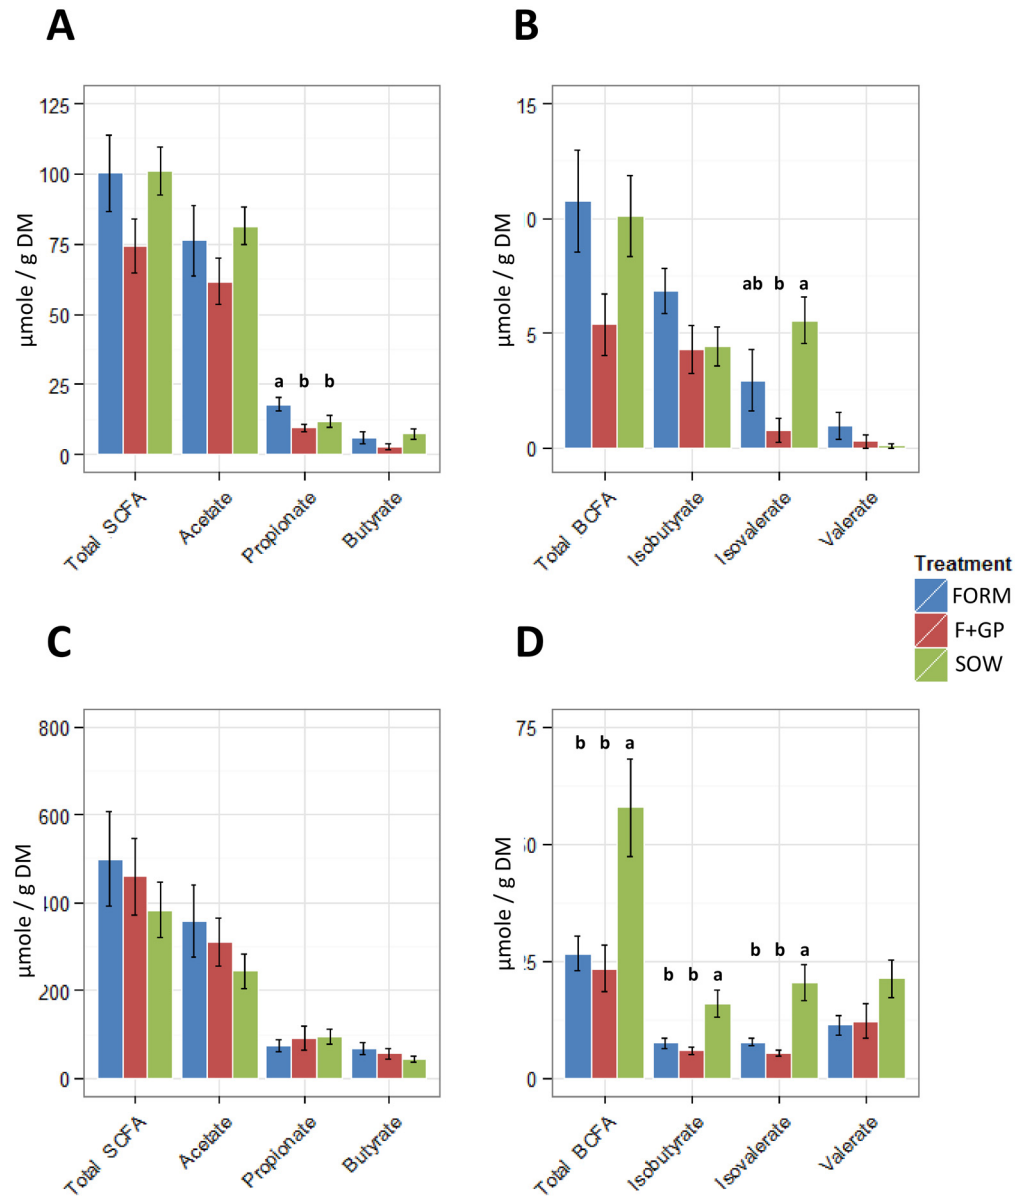

**Fig 6. Prebiotic supplementation leads to minimal changes in static volatile fatty acid concentration.** Volatile fatty acids detected in ileal (IL) and ascending colon (AC) contents of 21 d old piglets fed either a bovine milk-based formula (FORM), formula supplemented with GOS and PDX (F+GP) or sow-reared (SOW). VFAs detected in IL: (A) Short-chain fatty acids; (B) Branch-chain fatty acids. VFAs detected in the AC: (C) Short-chain fatty acids; (D) Branch-chain fatty acids. Values with different superscripts are significantly different ( $p < 0.05$ ).

doi:10.1371/journal.pone.0135494.g006

impact of GOS and PDX (2 g/L each) provided in a bovine milk-based infant formula was examined in neonatal piglets, a relevant infant model [26–28]. Since prebiotic fermentation is restricted to the distal GI tract [58], the IL and AC were targeted for analysis.

Prebiotic supplementation did not significantly affect the body weight gain or intestinal weight or length compared to SOW or FORM. Formula feeding minimally impacted the intestinal histomorphology, compared to SOW with no impact of prebiotic supplementation. The AC crypt depth was significantly deeper in the SOW piglets as compared to the formula-fed



piglets, which is consistent with our previous study that investigated bacterial translocation of GOS/PDX-supplemented formula-fed piglets [32]. Another study that supplemented formula with inulin and GOS did not detect differences in colonic histomorphology due to prebiotic supplementation; however a sow-reared group was not included [59]. Additional piglet studies that measured intestinal histomorphology following prebiotic supplementation only reported ileal measurements [24,31]. Therefore, we can conclude that the addition of GOS and PDX to formula is well tolerated and minimally impacts piglet intestinal development.

Changes in the IL and AC microbiota due to prebiotic supplementation were evaluated by high-throughput 16S amplicon sequencing. Significant differences in the intestinal microbiota composition were observed between the SOW and formula-fed piglets. In this study, there were differences in nutrition (sow's milk versus bovine milk-based formula), housing (group housing with siblings and sow versus individual-housing of formula-fed piglets) and exposure to novel microbiota. Previous work has shown that formula-fed and breast-fed infants have different microbial composition [7,60], that stress can affect the microbial composition [61] and that homogenization of the gut bacterial community may occur in co-housed animals [62]. Therefore, future microbial studies examining formula-fed versus mother-fed animals should take care to minimize the variation between groups.

Due to the distinct differences between SOW and the formula-fed piglets, the 16S amplicon sequencing data was reanalyzed without SOW in order to isolate differences solely due to prebiotic supplementation. The bacterial diversity and richness did not differ between FORM and F+GP; however, the relative abundance of several bacterial genera were significantly different in the AC. Interestingly, *Parabacteroides* and *Lactobacillus* were identified as being significantly more abundant in the AC of F+GP piglets. *Parabacteroides*, closely related to *Bacteroides* [63], may possess enzymes capable of utilizing either GOS or PDX; however, there is currently no published data to confirm this hypothesis. Martinez and colleagues [64] did report a significant increase of *Parabacteroides distasonis* in human feces following consumption of resistant starch type 4 but not resistant starch type 2. Future studies should evaluate the *Parabacteroides* community in relation to GOS/PDX supplementation in greater detail.

Historically, lactobacilli are considered health promoting microorganisms and have recently gained notoriety as probiotics [65]. Additionally, *Lactobacillus* sp. have been shown to be stimulated by prebiotic inclusion in formula milk [23,24]. Therefore, we hypothesized that the supplementation of GOS/PDX may alter the *in vivo* lactobacilli community. Following speciation of presumptive lactobacilli isolates, we observed that *L. johnsonii* was the predominant member in the IL and AC of all piglets. While the formula-fed piglets had a more diverse lactobacilli community, it was not apparent if any *Lactobacillus* sp. isolated were prebiotic-responsive. Therefore, the lactobacilli isolates were tested for their ability to utilize GOS and/or PDX as a sole carbon source (direct fermentation). We observed extensive utilization of GOS but minimal utilization of PDX by *Lactobacillus* sp. isolated from the IL and AC of all formula-fed piglets. Therefore, we further hypothesized that GOS supplementation may select for lactobacilli isolates that are capable of consuming longer chain GOS (DP3-6) rather than the mono- and disaccharide fractions (DP1-2) that are mostly removed by digestion prior to the IL and AC. To test this hypothesis, the post-fermentate was analyzed by TLC for consumption of GOS fractions (DP1-6). In general, most lactobacilli isolates were capable of consuming the mono- and disaccharide fractions (DP1-2); however, a smaller fraction of lactobacilli were capable of consuming trisaccharide GOS (DP3). Importantly, there was no difference regarding the number of FORM and F+GP lactobacilli isolates that could ferment the longer GOS fractions. Direct fermentation of GOS or PDX doesn't appear to be responsible for the increase in the lactobacilli population in the AC of the F+GP piglets.

Consistent with culture-dependent analysis, *L. johnsonii* was highly abundant in both FORM and F+GP piglets and was indicative of the F+GP treatment in the IL and AC. Various strains of *L. johnsonii* have been investigated in depth for their health promoting properties. In a rodent model for diabetes mellitus type 1 (T1DM), *L. johnsonii* was differentially abundant in the T1DM-resistant rats versus their T1DM-prone cohorts [66]. Furthermore, transmission of the strain *L. johnsonii* N6.2 can delay the onset of T1DM in prone rats [67]. The potential mechanisms of action of *L. johnsonii* N6.2 in this rodent model have been investigated and include enhancement of intestinal barrier function [67], reduction of intestinal oxidative stress [67] and modulation of the immune system [68–70]. Administration of *L. johnsonii* (La-1) to mice with branchial induced asthma dampened the autoimmune response by reducing the proportion of CD4<sup>+</sup> T lymphocytes expressing IL-4 and increasing CD4<sup>+</sup> T lymphocytes expressing IFN $\gamma$  [71]. Thus, promoting the growth of *L. johnsonii* by feeding PDX and GOS has the potential to modulate immune development; however, this remains to be directly tested.

Indicator species analysis of the 16S amplicon sequencing data identified two additional *Lactobacillus* species that were characteristic of the F+GP piglets. *L. vaginalis* was strongly indicative of the F+GP piglets in the IL, whereas *L. mucosae* was strongly indicative of the F+GP piglets in the AC. Surprisingly, the majority of *L. vaginalis* representative isolates (79%) were not GOS utilizers *in vitro* suggesting that direct GOS utilization did not lead to an increase in *L. vaginalis* *in vivo*.

Commonly, changes in microbial communities are coupled with the measurement of select byproducts of fermentation. Prebiotics, resistant to host digestion in the proximal GI of piglets and humans, are selectively fermented by the microbial community in the distal GI where the primary metabolites produced are SCFA from carbohydrate fermentation, [72] and BCFA from protein fermentation [73,74]. In the IL, no increase in total SCFA due to the prebiotics was detected; F+GP had the lowest SCFA concentration. Mono- and disaccharides are the primary substrate responsible for SCFA production in the IL, whereas prebiotics are largely fermented in the large bowel [58]. Total SCFA concentrations were not significantly different among the three groups in the AC; however, it is estimated that >95% of SCFA are rapidly absorbed by colonocytes [58]. Without the ability to measure the rate of host absorption of SCFA, and the total amount of SCFA in AC contents, we cannot determine the degree to which GOS and PDX were fermented *in vivo*. In young pigs fed a transgalactooligosaccharide-supplemented casein-cornstarch diet [75], ileal SCFA concentrations were similar to the amounts observed in the current study. Additionally, Fava and colleagues [76] reported that PDX supplementation did not affect SCFA in the distal small intestine or proximal colon of piglets. Thus, our results are consistent with these studies. The production of BCFA is primarily due to the fermentation of amino acids rather than prebiotics [73,74]. The SOW group had significantly higher concentrations of isobutyrate, isovalerate and total BCFA. This is consistent with additional piglet studies performed in our group [77], and may be due to proteins in sow milk that are resistant to small intestinal digestion, such as immunoglobulins.

This study provided a descriptive analysis of changes in the intestinal communities of neonatal piglets fed formula milk supplemented with GOS and PDX. Most interestingly were the significant increases in *Parabacteroides* and *Lactobacillus* sp. in the F+GP piglets. We did not observe an increase in the amount of lactobacilli that can utilize GOS nor the DP of GOS that was consumed. Therefore, we conclude that direct utilization of GOS was not responsible for the observed increase in *Lactobacillus* sp. Additional studies should be conducted to determine if GOS/PDX utilization by *Parabacteroides* sp. *in vitro* and to identify if this genus has physiological benefits to a neonatal piglet.

## Supporting Information

**S1 Fig. Ileal microbial communities of 21-d-old piglets fed either a bovine milk-based formula (FORM), formula supplemented with GOS and PDX (F+GP) or were sow-reared (SOW).** Heatmap illustrates the relative abundances of top 20 genera detected in the ileal contents. Hierarchical clustering of unweighted Unifrac distances is represented by the dendrogram.

(TIFF)

**S2 Fig. Ascending colon microbial communities of 21-d-old piglets fed either a bovine milk-based formula (FORM), formula supplemented with GOS and PDX (F+GP) or were sow-reared (SOW).** Heatmap illustrates the relative abundances of top 35 genera detected in ascending colon contents. Hierarchical clustering of unweighted Unifrac distances is represented by the dendrogram.

(TIFF)

**S1 Table. Carbohydrate utilization of the lactobacilli isolated from piglets fed formula (FORM), formula supplemented with GOS and PDX (F+GP).** Values represent the percent of lactobacilli able to utilize either glucose, GOS or PDX as a sole carbon source.

(DOCX)

**S2 Table. Genera of ascending colon contents of 21d old piglets fed formula (FORM), formula supplemented with GOS and PDX (F+GP).** Genera listed were significantly different between the FORM and F+GP piglets.

(DOCX)

**S3 Table. Lactobacilli detected in ileum and ascending colon of 21d old piglets fed formula (FORM), formula supplemented with GOS and PDX (F+GP) or sow-reared (SOW) as determined by 16S amplicon sequencing.** Values represent the relative abundance of *Lactobacilli* sp.

(DOCX)

## Acknowledgments

This study was supported by Mead Johnson Nutrition. The authors would like to acknowledge Latrice Tynes and Joseph Murray for their contributions to the analysis of IL and AC histomorphology and Josh Warren for his assistance with the thin layer chromatography. We would also like to acknowledge Dr. Marcia Monaco for assistance in caring for the piglets.

## Author Contributions

Conceived and designed the experiments: MJM SMD Z EJ. Performed the experiments: JLH DOK SED. Analyzed the data: MJM JLH DOK SBC. Contributed reagents/materials/analysis tools: SBC SED. Wrote the paper: JLH MJM.

## References

1. Bettelheim KA, Breadon A, Faiers MC, O'Farrell SM, Shooter RA. The origin of O serotypes of *Escherichia coli* in babies after normal delivery. *J Hyg (Lond)*. 1974; 72: 67–70.
2. Brook I, Barrett CT, Brinkman CR 3rd, Martin WJ, Finegold SM. Aerobic and anaerobic bacterial flora of the maternal cervix and newborn gastric fluid and conjunctiva: a prospective study. *Pediatrics*. 1979; 63: 451–455. PMID: [440845](#)
3. Dominguez-Bello MG, Costello EK, Contreras M, Magris M, Hidalgo G, Fierer N, et al. Delivery mode shapes the acquisition and structure of the initial microbiota across multiple body habitats in newborns. *Proc Natl Acad Sci U S A*. 2010; 107: 11971–11975. doi: [10.1073/pnas.1002601107](#) PMID: [20566857](#)

4. Hunt KM, Foster JA, Forney LJ, Schutte UM, Beck DL, Abdo Z, et al. Characterization of the diversity and temporal stability of bacterial communities in human milk. *PLoS One*. 2011; 6: e21313. doi: [10.1371/journal.pone.0021313](https://doi.org/10.1371/journal.pone.0021313) PMID: [21695057](https://pubmed.ncbi.nlm.nih.gov/21695057/)
5. Savage DC. Microbial ecology of the gastrointestinal tract. *Annu Rev Microbiol*. 1977; 31: 107–133. PMID: [334036](https://pubmed.ncbi.nlm.nih.gov/334036/)
6. Palmer C, Bik EM, DiGiulio DB, Relman DA, Brown PO. Development of the human infant intestinal microbiota. *PLoS Biol*. 2007; 5: e177. PMID: [17594176](https://pubmed.ncbi.nlm.nih.gov/17594176/)
7. Harmsen HJ, Wildeboer-Veloo AC, Raangs GC, Wagendorp AA, Klijn N, Bindels JG, et al. Analysis of intestinal flora development in breast-fed and formula-fed infants by using molecular identification and detection methods. *J Pediatr Gastroenterol Nutr*. 2000; 30: 61–67. PMID: [10630441](https://pubmed.ncbi.nlm.nih.gov/10630441/)
8. Kunz C, Rudloff S, Baier W, Klein N, Strobel S. Oligosaccharides in human milk: structural, functional, and metabolic aspects. *Annu Rev Nutr*. 2000; 20: 699–722. PMID: [10940350](https://pubmed.ncbi.nlm.nih.gov/10940350/)
9. Coppa GV, Zampini L, Galeazzi T, Gabrielli O. Prebiotics in human milk: a review. *Dig Liver Dis*. 2006; 38 Suppl 2: S291–4. PMID: [17259094](https://pubmed.ncbi.nlm.nih.gov/17259094/)
10. Gopal PK, Gill HS. Oligosaccharides and glycoconjugates in bovine milk and colostrum. *Br J Nutr*. 2000; 84 Suppl 1: S69–74. PMID: [11242449](https://pubmed.ncbi.nlm.nih.gov/11242449/)
11. Martin-Sosa S, Martin MJ, Garcia-Pardo LA, Hueso P. Sialyloligosaccharides in human and bovine milk and in infant formulas: variations with the progression of lactation. *J Dairy Sci*. 2003; 86: 52–59. PMID: [12613848](https://pubmed.ncbi.nlm.nih.gov/12613848/)
12. Eshach Adiv O, Berant M, Shamir R. New supplements to infant formulas. *Pediatr Endocrinol Rev*. 2004; 2: 216–224. PMID: [16429109](https://pubmed.ncbi.nlm.nih.gov/16429109/)
13. Bode L. Human milk oligosaccharides: prebiotics and beyond. *Nutr Rev*. 2009; 67 Suppl 2: S183–91. doi: [10.1111/j.1753-4887.2009.00239.x](https://doi.org/10.1111/j.1753-4887.2009.00239.x) PMID: [19906222](https://pubmed.ncbi.nlm.nih.gov/19906222/)
14. Rao S, Srinivasjois R, Patole S. Prebiotic supplementation in full-term neonates: a systematic review of randomized controlled trials. *Arch Pediatr Adolesc Med*. 2009; 163: 755–764. doi: [10.1001/archpediatrics.2009.94](https://doi.org/10.1001/archpediatrics.2009.94) PMID: [19652109](https://pubmed.ncbi.nlm.nih.gov/19652109/)
15. Gibson GR, Roberfroid MB. Dietary modulation of the human colonic microbiota: introducing the concept of prebiotics. *J Nutr*. 1995; 125: 1401–1412. PMID: [7782892](https://pubmed.ncbi.nlm.nih.gov/7782892/)
16. Cummings JH, Macfarlane GT. Gastrointestinal effects of prebiotics. *Br J Nutr*. 2002; 87 Suppl 2: S145–51. PMID: [12088511](https://pubmed.ncbi.nlm.nih.gov/12088511/)
17. Roberfroid MB. Inulin-type fructans: functional food ingredients. *J Nutr*. 2007; 137: 2493S–2502S. PMID: [17951492](https://pubmed.ncbi.nlm.nih.gov/17951492/)
18. Kelly G. Inulin-type prebiotics—a review: part 1. *Altern Med Rev*. 2008; 13: 315–329. PMID: [19152479](https://pubmed.ncbi.nlm.nih.gov/19152479/)
19. Kelly G. Inulin-type prebiotics: a review. (Part 2). *Altern Med Rev*. 2009; 14: 36–55. PMID: [19364192](https://pubmed.ncbi.nlm.nih.gov/19364192/)
20. Boehm G, Lidestri M, Casetta P, Jelinek J, Negretti F, Stahl B, et al. Supplementation of a bovine milk formula with an oligosaccharide mixture increases counts of faecal bifidobacteria in preterm infants. *Archives of Disease in Childhood—Fetal and Neonatal Edition*. 2002; 86: F178–F181. PMID: [11978748](https://pubmed.ncbi.nlm.nih.gov/11978748/)
21. Nakamura N, Gaskins HR, Collier CT, Nava GM, Rai D, Petschow B, et al. Molecular ecological analysis of fecal bacterial populations from term infants fed formula supplemented with selected blends of prebiotics. *Appl Environ Microbiol*. 2009; 75: 1121–1128. doi: [10.1128/AEM.02359-07](https://doi.org/10.1128/AEM.02359-07) PMID: [19088307](https://pubmed.ncbi.nlm.nih.gov/19088307/)
22. Veereman-Wauters G, Staelens S, Van de Broek H, Plaskie K, Wesling F, Roger LC, et al. Physiological and bifidogenic effects of prebiotic supplements in infant formulae. *J Pediatr Gastroenterol Nutr*. 2011; 52: 763–771. doi: [10.1097/MPG.0b013e3182139f39](https://doi.org/10.1097/MPG.0b013e3182139f39) PMID: [21593649](https://pubmed.ncbi.nlm.nih.gov/21593649/)
23. Salvini F, Riva E, Salvatici E, Boehm G, Jelinek J, Banderali G, et al. A specific prebiotic mixture added to starting infant formula has long-lasting bifidogenic effects. *J Nutr*. 2011; 141: 1335–1339. doi: [10.3945/jn.110.136747](https://doi.org/10.3945/jn.110.136747) PMID: [21613452](https://pubmed.ncbi.nlm.nih.gov/21613452/)
24. Herfel TM, Jacobi SK, Lin X, Fellner V, Walker DC, Jouni ZE, et al. Polydextrose enrichment of infant formula demonstrates prebiotic characteristics by altering intestinal microbiota, organic Acid concentrations, and cytokine expression in suckling piglets. *J Nutr*. 2011; 141: 2139–2145. doi: [10.3945/jn.111.143727](https://doi.org/10.3945/jn.111.143727) PMID: [22013198](https://pubmed.ncbi.nlm.nih.gov/22013198/)
25. Sanders ME, Akkermans LM, Haller D, Hammerman C, Heimbach J, Hormannsperger G, et al. Safety assessment of probiotics for human use. *Gut Microbes*. 2010; 1: 164–185. doi: [10.4161/gmic.1.3.12127](https://doi.org/10.4161/gmic.1.3.12127) PMID: [21327023](https://pubmed.ncbi.nlm.nih.gov/21327023/)
26. Domeneghini C, Di Giancamillo A, Arrighi S, Bosi G. Gut-trophic feed additives and their effects upon the gut structure and intestinal metabolism. State of the art in the pig, and perspectives towards humans. *Histol Histopathol*. 2006; 21: 273–283. PMID: [16372249](https://pubmed.ncbi.nlm.nih.gov/16372249/)

27. Sangild PT, Thyman T, Schmidt M, Stoll B, Burrin DG, Buddington RK. Invited Review: The preterm pig as a model in pediatric gastroenterology. *J Anim Sci*. 2013; 91: 4713–4729. doi: [10.2527/jas.2013-6359](https://doi.org/10.2527/jas.2013-6359) PMID: [23942716](https://pubmed.ncbi.nlm.nih.gov/23942716/)
28. Odle J, Lin X, Jacobi SK, Kim SW, Stahl CH. The suckling piglet as an agrimedical model for the study of pediatric nutrition and metabolism. *Annu Rev Anim Biosci*. 2014; 2: 419–444. doi: [10.1146/annurev-animal-022513-114158](https://doi.org/10.1146/annurev-animal-022513-114158) PMID: [25384150](https://pubmed.ncbi.nlm.nih.gov/25384150/)
29. Konstantinov SR, Zhu WY, Williams BA, Tamminga S, Vos WM, Akkermans AD. Effect of fermentable carbohydrates on piglet faecal bacterial communities as revealed by denaturing gradient gel electrophoresis analysis of 16S ribosomal DNA. *FEMS Microbiol Ecol*. 2003; 43: 225–235. doi: [10.1111/j.1574-6941.2003.tb01062.x](https://doi.org/10.1111/j.1574-6941.2003.tb01062.x) PMID: [19719683](https://pubmed.ncbi.nlm.nih.gov/19719683/)
30. Konstantinov SR, Awati A, Smidt H, Williams BA, Akkermans AD, de Vos WM. Specific response of a novel and abundant *Lactobacillus amylovorus*-like phylotype to dietary prebiotics in the guts of weaning piglets. *Appl Environ Microbiol*. 2004; 70: 3821–3830. PMID: [15240251](https://pubmed.ncbi.nlm.nih.gov/15240251/)
31. Herfel TM, Jacobi SK, Lin X, Walker DC, Jouni ZE, Odle J. Safety evaluation of polydextrose in infant formula using a suckling piglet model. *Food Chem Toxicol*. 2009; 47: 1530–1537. doi: [10.1016/j.fct.2009.03.039](https://doi.org/10.1016/j.fct.2009.03.039) PMID: [19358872](https://pubmed.ncbi.nlm.nih.gov/19358872/)
32. Monaco MH, Kashtanov DO, Wang M, Walker DC, Rai D, Jouni ZE, et al. Addition of polydextrose and galactooligosaccharide to formula does not affect bacterial translocation in the neonatal piglet. *J Pediatr Gastroenterol Nutr*. 2011; 52: 210–216. doi: [10.1097/MPG.0b013e3181ffcaee](https://doi.org/10.1097/MPG.0b013e3181ffcaee) PMID: [21240011](https://pubmed.ncbi.nlm.nih.gov/21240011/)
33. Li M, Bauer LL, Chen X, Wang M, Kuhlenschmidt TB, Kuhlenschmidt MS, et al. Microbial Composition and In Vitro Fermentation Patterns of Human Milk Oligosaccharides and Prebiotics Differ between Formula-Fed and Sow-Reared Piglets. *J Nutr*. 2012; 142: 681–689. doi: [10.3945/jn.111.154427](https://doi.org/10.3945/jn.111.154427) PMID: [22399522](https://pubmed.ncbi.nlm.nih.gov/22399522/)
34. Muir HE, Murray SM, Fahey GC Jr, Merchen NR, Reinhart GA. Nutrient digestion by ileal cannulated dogs as affected by dietary fibers with various fermentation characteristics. *J Anim Sci*. 1996; 74: 1641–1648. PMID: [8818810](https://pubmed.ncbi.nlm.nih.gov/8818810/)
35. Korhonen JM, Scivagnotis Y, von Wright A. Characterization of dominant cultivable lactobacilli and their antibiotic resistance profiles from faecal samples of weaning piglets. *J Appl Microbiol*. 2007; 103: 2496–2503. PMID: [18045434](https://pubmed.ncbi.nlm.nih.gov/18045434/)
36. Blaiotta G, Fusco V, Ercolini D, Aponte M, Pepe O, Villani F. *Lactobacillus* strain diversity based on partial hsp60 gene sequences and design of PCR-restriction fragment length polymorphism assays for species identification and differentiation. *Appl Environ Microbiol*. 2008; 74: 208–215. PMID: [17993558](https://pubmed.ncbi.nlm.nih.gov/17993558/)
37. Lane DJ. 16S/23S rRNA Sequencing. In: Anonymous Nucleic Acid Techniques in Bacterial Systematics. New York, NY: John Wiley and Sons; 1991. pp. 115–175.
38. Lane DJ, Pace B, Olsen GJ, Stahl DA, Sogin ML, Pace NR. Rapid determination of 16S ribosomal RNA sequences for phylogenetic analyses. *Proc Natl Acad Sci U S A*. 1985; 82: 6955–6959. PMID: [2413450](https://pubmed.ncbi.nlm.nih.gov/2413450/)
39. Garrido D, Ruiz-Moyano S, Jimenez-Espinoza R, Eom HJ, Block DE, Mills DA. Utilization of galactooligosaccharides by *Bifidobacterium longum* subsp. *infantis* isolates. *Food Microbiol*. 2013; 33: 262–270. doi: [10.1016/j.fm.2012.10.003](https://doi.org/10.1016/j.fm.2012.10.003) PMID: [23200660](https://pubmed.ncbi.nlm.nih.gov/23200660/)
40. Barry KA, Hernot DC, Middelbos IS, Francis C, Dunsford B, Swanson KS, et al. Low-level fructan supplementation of dogs enhances nutrient digestion and modifies stool metabolite concentrations, but does not alter fecal microbiota populations. *J Anim Sci*. 2009; 87: 3244–3252. doi: [10.2527/jas.2008-1659](https://doi.org/10.2527/jas.2008-1659) PMID: [19574565](https://pubmed.ncbi.nlm.nih.gov/19574565/)
41. Yu Z, Morrison M. Improved extraction of PCR-quality community DNA from digesta and fecal samples. *BioTechniques*. 2004; 36: 808–812. PMID: [15152600](https://pubmed.ncbi.nlm.nih.gov/15152600/)
42. Louis P, Flint HJ. Development of a semiquantitative degenerate real-time pcr-based assay for estimation of numbers of butyryl-coenzyme A (CoA) CoA transferase genes in complex bacterial samples. *Appl Environ Microbiol*. 2007; 73: 2009–2012. PMID: [17259367](https://pubmed.ncbi.nlm.nih.gov/17259367/)
43. Dowd SE, Sun Y, Wolcott RD, Domingo A, Carroll JA. Bacterial tag-encoded FLX amplicon pyrosequencing (bTEFAP) for microbiome studies: bacterial diversity in the ileum of newly weaned *Salmonella*-infected pigs. *Foodborne Pathog Dis*. 2008; 5: 459–472. doi: [10.1089/fpd.2008.0107](https://doi.org/10.1089/fpd.2008.0107) PMID: [18713063](https://pubmed.ncbi.nlm.nih.gov/18713063/)
44. Ishak HD, Plowes R, Sen R, Kellner K, Meyer E, Estrada DA, et al. Bacterial diversity in *Solenopsis invicta* and *Solenopsis geminata* ant colonies characterized by 16S amplicon 454 pyrosequencing. *Microb Ecol*. 2011; 61: 821–831. doi: [10.1007/s00248-010-9793-4](https://doi.org/10.1007/s00248-010-9793-4) PMID: [21243351](https://pubmed.ncbi.nlm.nih.gov/21243351/)
45. R Development Core Team. R: A language and environment for statistical computing. 2011; ISBN 3-900051-07-0.



46. Warnes GR, Bolker B, Bonebakker L, Gentleman R, Liaw WHA, Lumley T, et al. *gplots: Various R Programming Tools for Plotting Data*. 2015;2:16.0.
47. Oksanen J, Blanchet FG, Kindt R, Legendre PO, R. B., Simpson GL, Solymos P, et al. *vegan: Community Ecology Package*. 2011;R package version 1.17–8.
48. Anderson MJ, Willis TJ. Canonical analysis of principal coordinates: a useful method of constrained ordination for ecology. *Ecology*. 2003; 84: 511–511–525.
49. Lozupone C, Knight R. UniFrac: a new phylogenetic method for comparing microbial communities. *Appl Environ Microbiol*. 2005; 71: 8228–8235. PMID: [16332807](#)
50. Caporaso JG, Kuczynski J, Stombaugh J, Bittinger K, Bushman FD, Costello EK, et al. QIIME allows analysis of high-throughput community sequencing data. *Nat Methods*. 2010; 7: 335–336. doi: [10.1038/nmeth.f.303](#) PMID: [20383131](#)
51. Roberts DW. *labdsv: Ordination and Multivariate Analysis for Ecology*. 2010;1.4–1.
52. Dufrene M, Legendre P. Species assemblages and indicator species: the need for a flexible asymmetrical approach. *Ecol Monogr*. 1997; 67: 345–345–366.
53. Ziegler E, Vanderhoof JA, Petschow B, Mitmesser SH, Stolz SI, Harris CL, et al. Term infants fed formula supplemented with selected blends of prebiotics grow normally and have soft stools similar to those reported for breast-fed infants. *J Pediatr Gastroenterol Nutr*. 2007; 44: 359–364. PMID: [17325558](#)
54. Davis LM, Martinez I, Walter J, Hutkins R. A dose dependent impact of prebiotic galactooligosaccharides on the intestinal microbiota of healthy adults. *Int J Food Microbiol*. 2010; 144: 285–292. doi: [10.1016/j.ijfoodmicro.2010.10.007](#) PMID: [21059476](#)
55. Davis LM, Martinez I, Walter J, Goin C, Hutkins RW. Barcoded pyrosequencing reveals that consumption of galactooligosaccharides results in a highly specific bifidogenic response in humans. *PLoS One*. 2011; 6: e25200. doi: [10.1371/journal.pone.0025200](#) PMID: [21966454](#)
56. Ribeiro TC, Costa-Ribeiro H Jr, Almeida PS, Pontes MV, Leite ME, Filadelfo LR, et al. Stool Pattern Changes in Toddlers Consuming a Follow-on Formula Supplemented with a Prebiotic Blend of Polydextrose (PDX) and Galactooligosaccharides (GOS). *J Pediatr Gastroenterol Nutr*. 2011.
57. Scalabrin DM, Mitmesser SH, Welling GW, Harris CL, Marunycz JD, Walker DC, et al. New prebiotic blend of polydextrose and galacto-oligosaccharides has a bifidogenic effect in young infants. *J Pediatr Gastroenterol Nutr*. 2012; 54: 343–352. doi: [10.1097/MPG.0b013e318237ed95](#) PMID: [21946836](#)
58. Topping DL, Clifton PM. Short-chain fatty acids and human colonic function: roles of resistant starch and nonstarch polysaccharides. *Physiol Rev*. 2001; 81: 1031–1064. PMID: [11427691](#)
59. Aufreiter S, Kim JH, O'Connor DL. Dietary oligosaccharides increase colonic weight and the amount but not concentration of bacterially synthesized folate in the colon of piglets. *J Nutr*. 2011; 141: 366–372. doi: [10.3945/jn.110.135343](#) PMID: [21270368](#)
60. Mountzouris KC, McCartney AL, Gibson GR. Intestinal microflora of human infants and current trends for its nutritional modulation. *Br J Nutr*. 2002; 87: 405–420. PMID: [12010580](#)
61. Collins SM, Bercik P. The relationship between intestinal microbiota and the central nervous system in normal gastrointestinal function and disease. *Gastroenterology*. 2009; 136: 2003–2014. doi: [10.1053/j.gastro.2009.01.075](#) PMID: [19457424](#)
62. Thompson CL, Wang B, Holmes AJ. The immediate environment during postnatal development has long-term impact on gut community structure in pigs. *ISME J*. 2008; 2: 739–748. doi: [10.1038/ismej.2008.29](#) PMID: [18356821](#)
63. Karlsson FH, Ussery DW, Nielsen J, Nookaew I. A closer look at bacteroides: phylogenetic relationship and genomic implications of a life in the human gut. *Microb Ecol*. 2011; 61: 473–485. doi: [10.1007/s00248-010-9796-1](#) PMID: [21222211](#)
64. Martinez I, Kim J, Duffy PR, Schlegel VL, Walter J. Resistant starches types 2 and 4 have differential effects on the composition of the fecal microbiota in human subjects. *PLoS One*. 2010; 5: e15046. doi: [10.1371/journal.pone.0015046](#) PMID: [21151493](#)
65. Walter J. Ecological role of lactobacilli in the gastrointestinal tract: implications for fundamental and biomedical research. *Appl Environ Microbiol*. 2008; 74: 4985–4996. doi: [10.1128/AEM.00753-08](#) PMID: [18539818](#)
66. Roesch LF, Lorca GL, Casella G, Giongo A, Naranjo A, Pionzio AM, et al. Culture-independent identification of gut bacteria correlated with the onset of diabetes in a rat model. *ISME J*. 2009; 3: 536–548. doi: [10.1038/ismej.2009.5](#) PMID: [19225551](#)
67. Valladares R, Sankar D, Li N, Williams E, Lai KK, Abdelgeliel AS, et al. *Lactobacillus johnsonii* N6.2 mitigates the development of type 1 diabetes in BB-DP rats. *PLoS One*. 2010; 5: e10507. doi: [10.1371/journal.pone.0010507](#) PMID: [20463897](#)



68. Kingma SD, Li N, Sun F, Valladares RB, Neu J, Lorca GL. Lactobacillus johnsonii N6.2 stimulates the innate immune response through Toll-like receptor 9 in Caco-2 cells and increases intestinal crypt Paneth cell number in biobreeding diabetes-prone rats. *J Nutr.* 2011; 141: 1023–1028. doi: [10.3945/jn.110.135517](https://doi.org/10.3945/jn.110.135517) PMID: [21490291](https://pubmed.ncbi.nlm.nih.gov/21490291/)
69. Lau K, Benitez P, Ardissone A, Wilson TD, Collins EL, Lorca G, et al. Inhibition of type 1 diabetes correlated to a Lactobacillus johnsonii N6.2-mediated Th17 bias. *J Immunol.* 2011; 186: 3538–3546. doi: [10.4049/jimmunol.1001864](https://doi.org/10.4049/jimmunol.1001864) PMID: [21317395](https://pubmed.ncbi.nlm.nih.gov/21317395/)
70. Valladares R, Bojilova L, Potts AH, Cameron E, Gardner C, Lorca G, et al. Lactobacillus johnsonii inhibits indoleamine 2,3-dioxygenase and alters tryptophan metabolite levels in BioBreeding rats. *FASEB J.* 2013; 27: 1711–1720. doi: [10.1096/fj.12-223339](https://doi.org/10.1096/fj.12-223339) PMID: [23303207](https://pubmed.ncbi.nlm.nih.gov/23303207/)
71. Yang J, Li W, Sun R, Li B. The effect of Lactobacillus johnsonii Ncc533 (La1) on the balance of Th1/Th2 cells in BALB/c mice. *Clin Invest Med.* 2011; 34: E254. PMID: [21810385](https://pubmed.ncbi.nlm.nih.gov/21810385/)
72. Cummings JH, Macfarlane GT, Englyst HN. Prebiotic digestion and fermentation. *Am J Clin Nutr.* 2001; 73: 415S–420S. PMID: [11157351](https://pubmed.ncbi.nlm.nih.gov/11157351/)
73. Macfarlane GT, Cummings JH, Allison C. Protein degradation by human intestinal bacteria. *J Gen Microbiol.* 1986; 132: 1647–1656. PMID: [3543210](https://pubmed.ncbi.nlm.nih.gov/3543210/)
74. Macfarlane GT, Gibson GR, Beatty E, Cummings JH. Estimation of short-chain fatty acid production from protein by human intestinal bacteria based on branched-chain fatty acid measurements. *FEMS Microbiol Lett.* 1992; 101: 81–88.
75. Smiricky-Tjardes MR, Grieshop CM, Flickinger EA, Bauer LL, Fahey GC Jr. Dietary galactooligosaccharides affect ileal and total-tract nutrient digestibility, ileal and fecal bacterial concentrations, and ileal fermentative characteristics of growing pigs. *J Anim Sci.* 2003; 81: 2535–2545. PMID: [14552381](https://pubmed.ncbi.nlm.nih.gov/14552381/)
76. Fava F, Makivuokko H, Siljander-Rasi H, Putaala H, Tiihonen K, Stowell J, et al. Effect of polydextrose on intestinal microbes and immune functions in pigs. *Br J Nutr.* 2007; 98: 123–133. PMID: [17391567](https://pubmed.ncbi.nlm.nih.gov/17391567/)
77. Wang M, Radlowski EC, Monaco MH, Fahey GC Jr, Gaskins HR, Donovan SM. Mode of delivery and early nutrition modulate microbial colonization and fermentation products in neonatal piglets. *J Nutr.* 2013; 143: 795–803. doi: [10.3945/jn.112.173096](https://doi.org/10.3945/jn.112.173096) PMID: [23616518](https://pubmed.ncbi.nlm.nih.gov/23616518/)
